# Supplementary material for: NMR Structure of the Myristylated Feline Immunodeficiency Virus Matrix Protein
Source: PubMed Central journal article supplement (PMC4452903; doi:10.3390/v7052210), 2015-04-30
Supplement: viruses-07-02210-s001.pdf [file viruses-07-02210-s001.pdf]

## Supplementary Materials

### NMR Structure of the Myristylated Feline Immunodeficiency Virus Matrix Protein

Lola A. Brown <sup>1</sup>, Cassiah Cox <sup>1</sup>, Janae Baptiste <sup>1</sup>, Holly Summers <sup>1</sup>, Ryan Button <sup>1</sup>, Kennedy Bahlow <sup>1</sup>, Vaughn Spurrier <sup>1</sup>, Jenna Kyser <sup>1</sup>, Benjamin G. Luttge <sup>2</sup>, Lillian Kuo <sup>2</sup>, Eric O. Freed <sup>2,\*</sup> and Michael F. Summers <sup>1,\*</sup>

<sup>1</sup> Howard Hughes Medical Institute, University of Maryland Baltimore County, 1000 Hilltop Circle, Baltimore, MD 21250, USA; E-Mails: lola.brown@yale.edu (L.A.B.); cassiah.cox@nih.gov (C.C.); janaeb@umbc.edu (J.B.); hsummers@umbc.edu (H.S.); ryan.button@umaryland.edu (R.B.); kennedy.bahlow@temple.edu (K.B.); vspurrier@uchicago.edu (V.S.); jmk216@lehigh.edu (J.K.); summers@hhmi.umbc.edu (M.F.S.)

<sup>2</sup> Virus-Cell Interaction Section, HIV Drug Resistance Program, National Cancer Institute at Frederick, Frederick, MD 21702-1201, USA; E-Mails: bxl244@case.edu (B.G.L.); kuols@mail.nih.gov (L.K.)

\* Authors to whom correspondence should be addressed; E-Mails: efreed@mail.nih.gov (E.O.F.); summers@hhmi.umbc.edu (M.F.S.); Tel.: +1-301-846-6223 (E.O.F.); +1-410-455-2527 (M.F.S.)

**Table S1.** Myristylation signal of myristylated feline proteins. Note that many myristylated feline proteins have the consensus mammalian myristyl signal M-G-X-X-X-S pattern. The sixth residue is in the bolded box.

| Feline Protein                                             | Myristyl Signal |   |   |   |   |          | Accession Number |
|------------------------------------------------------------|-----------------|---|---|---|---|----------|------------------|
| Recoverin                                                  | M               | G | N | S | K | <b>S</b> | XP_003996258.1   |
| neuronal tissue-enriched acidic protein                    | M               | G | G | K | L | <b>S</b> | XP_003981588     |
| tyrosine-protein kinase Lyn isoform 1                      | M               | G | C | I | K | <b>S</b> | XP_003999866.1   |
| Tyrosine-protein kinase Yes                                | M               | G | C | I | K | <b>S</b> | XP_003995101.1   |
| nitric oxide synthase                                      | M               | G | N | L | K | <b>S</b> | XP_003983267.1   |
| calcineurin subunit B type 2                               | M               | G | N | E | A | <b>S</b> | XP_003995756.1   |
| calcineurin type 2                                         | M               | G | N | E | A | <b>S</b> | XP_003995756.1   |
| ADP-ribosylation factor 4                                  | M               | G | L | T | I | <b>S</b> | XP_003982414.1   |
| Paladin                                                    | M               | G | T | T | A | <b>S</b> | XP_003994073     |
| tyrosine-protein kinase -SRC                               | M               | G | S | N | K | <b>S</b> | XP_003994073     |
| NADH cytochrome reductase                                  | M               | G | F | Q | P | <b>S</b> | XP_003999428.1   |
| ADP-ribosylation factor 3                                  | M               | G | N | I | F | <b>G</b> | XP_003988679.1   |
| annexin XIII                                               | M               | G | N | R | H | <b>A</b> | XP_004000148.1   |
| myristylated and palmitylated serine-threonine kinase MPSK | M               | G | H | A | L | <b>C</b> | XP_003991222.1   |
| tyrosine-protein kinase Fgr                                | M               | G | C | V | F | <b>C</b> | XP_003989804.1   |

**Table S2.** Sequence alignment of first twelve amino acid residues of several isolates of FIV. Glycine 6 (bolded column) is conserved throughout the species (FIV sequences kindly provided by Brian Foley, HIV databases, [www.hiv.lanl.gov](http://www.hiv.lanl.gov)).

| <b>FIV Isolate</b>  | <b>Myristyl Signal</b> |          |   |   |   |          |   |   |   |   |   |   |
|---------------------|------------------------|----------|---|---|---|----------|---|---|---|---|---|---|
| FIVPETLM            | <b>M</b>               | <b>G</b> | N | G | Q | <b>G</b> | R | D | W | K | M | A |
| FIVZ1   X57002      | <b>M</b>               | <b>G</b> | N | G | Q | <b>G</b> | R | D | W | K | M | A |
| FIVUSIL2489         | <b>M</b>               | <b>G</b> | N | G | Q | <b>G</b> | R | D | W | K | M | A |
| FIV-C   AF474246    | <b>M</b>               | <b>G</b> | N | G | Q | <b>G</b> | R | D | W | K | V | A |
| FIVUSCAPPR          | <b>M</b>               | <b>G</b> | N | G | Q | <b>G</b> | R | D | W | K | M | A |
| FIVJPTM2            | <b>M</b>               | <b>G</b> | N | G | Q | <b>G</b> | R | D | W | K | M | A |
| FIVPleE   EU117992  | <b>M</b>               | <b>G</b> | N | E | Q | <b>G</b> | K | E | V | K | A | A |
| FIVKZOMA            | <b>M</b>               | <b>G</b> | N | E | Q | <b>G</b> | K | E | V | K | A | A |
| FIVPleB   EU117991  | <b>M</b>               | <b>G</b> | N | E | Q | <b>G</b> | K | E | V | K | A | A |
| PLB14CG             | <b>M</b>               | <b>G</b> | N | N | Q | <b>G</b> | K | E | L | K | A | A |
| PLV_vanc   DQ192583 | <b>M</b>               | <b>G</b> | N | E | S | <b>G</b> | K | E | E | R | I | I |
| PCOJM01   EF455609  | <b>M</b>               | <b>G</b> | N | E | S | <b>G</b> | K | E | E | R | V | I |
| PCOYM137   EF455609 | <b>M</b>               | <b>G</b> | N | E | S | <b>G</b> | K | E | E | R | V | I |
| PCOYM137   EF455609 | <b>M</b>               | <b>G</b> | N | E | S | <b>G</b> | K | E | E | R | V | I |
| PCOYM137   EF455611 | <b>M</b>               | <b>G</b> | N | E | S | <b>G</b> | K | E | E | R | V | I |
| PCOJF6   EF455610   | <b>M</b>               | <b>G</b> | N | E | S | <b>G</b> | K | E | E | R | V | I |
| PCOSR631   EF455613 | <b>M</b>               | <b>G</b> | N | E | S | <b>G</b> | K | E | E | R | V | I |
| PCOSR631   EF455614 | <b>M</b>               | <b>G</b> | N | E | S | <b>G</b> | K | E | E | R | V | I |
| PCOYF127   EF455612 | <b>M</b>               | <b>G</b> | N | E | S | <b>G</b> | K | E | E | R | V | I |
| PCOGC34   EF455603  | <b>M</b>               | <b>G</b> | N | E | S | <b>G</b> | K | E | E | R | V | I |
| PCOMC350   EF455604 | <b>M</b>               | <b>G</b> | N | E | S | <b>G</b> | K | E | E | R | V | I |
| PCOMC121   EF455606 | <b>M</b>               | <b>G</b> | N | E | S | <b>G</b> | K | E | E | R | V | I |
| PCOYM29   EF455607  | <b>M</b>               | <b>G</b> | N | E | S | <b>G</b> | K | E | E | R | V | I |
| PCOYF16   EF455608  | <b>M</b>               | <b>G</b> | N | E | S | <b>G</b> | K | E | E | R | V | I |
| PCOCOLV   EF455615  | <b>M</b>               | <b>G</b> | N | E | S | <b>G</b> | K | E | E | R | V | I |
| PCOMC100   EF455605 | <b>M</b>               | <b>G</b> | N | E | S | <b>G</b> | K | E | E | R | I | I |
